# Supplementary material for: Preclinical Toxicity and Safety of MM-129—First-in-Class BTK/PD-L1 Inhibitor as a Potential Candidate against Colon Cancer
Source: MDPI journal article supplement (doi:10.3390/pharmaceutics13081222), 2021-08-07
Supplement: s1 [file s1]

# Supplementary material: Preclinical Toxicity and Safety of MM-129 – First-in-Class BTK/PD-L1 Inhibitor as a Potential Candidate against Colon Cancer

Justyna Magdalena Hermanowicz, Bartłomiej Kalaska, Krystyna Pawlak, Beata Sieklucka, Joanna Miklosz, Mariusz Mojzych and Dariusz Pawlak

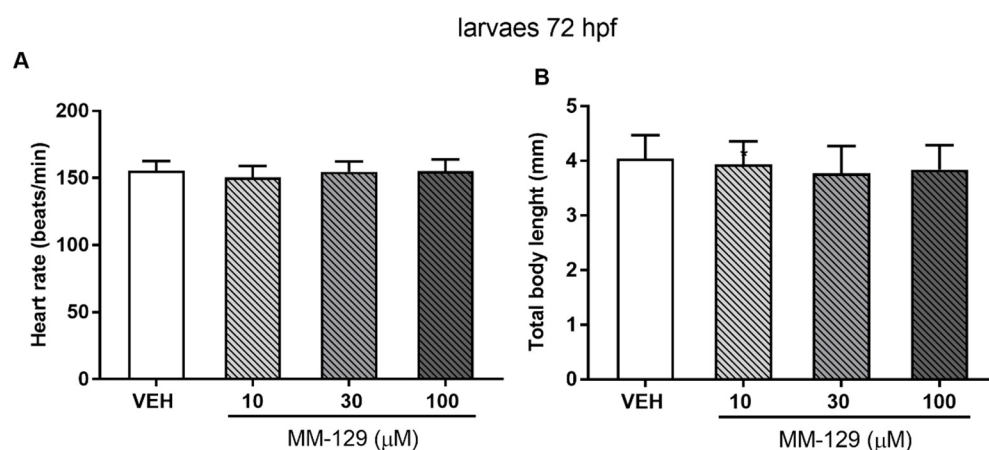

**Figure S1.** Heart rate (A) and total body length (B) of zebrafish larvae 72 hpf at 96 h of incubation with MM-129. Data are shown as mean $\pm$ SD;  $n = 60$  for each concentration. Abbreviations: MM-129 - pyrazolo[4,3-e]tetrazolo[4,5-b][1,2,4]triazine sulfonamide; VEH - vehicle; hpf - hour post-fertilization.

**Table S1.** Pharmacokinetics and tissue distribution of MM-129 in rats.

|                                                              | MM-129<br>10 $\mu\text{mol/kg}$ iv | MM-129<br>10 $\mu\text{mol/kg}$ ip |
|--------------------------------------------------------------|------------------------------------|------------------------------------|
| CL ( $\mu\text{mol/kg}$ )/( $\mu\text{mol/L}$ )/min          | 0.04 (0.03-0.05)                   | -                                  |
| $V_{ss}$ ( $\mu\text{mol/kg}$ )/( $\mu\text{mol/L}$ )        | 0.60 (0.54-1.17)                   | -                                  |
| Half life (min)                                              | 18.15 (12.74-25.84)                | 63.52 (51.54-75.49)                |
| $T_{max}$ (min)                                              | 10 (10-10)                         | 20 (10-30)                         |
| $C_{max}$ ( $\mu\text{mol/L}$ )                              | 10.14 (5.83-10.28)                 | 3.46 (2.22-4.69)                   |
| $AUC_{0-120\text{min}}$ ( $\mu\text{mol/L}\cdot\text{min}$ ) | 360 (220-401)                      | 247 (183-310)                      |
| $AUC_{0-\infty}$ ( $\mu\text{mol/L}\cdot\text{min}$ )        | 360 (225-405)                      | 346 (292-399)                      |
| Lung concentration (nmol/g of tissue)                        | -                                  | 0.46 (0.37-0.81)                   |
| Liver concentration (nmol/g of tissue)                       | -                                  | 0.17 (0.15-0.52)                   |
| Spleen concentration (nmol/g of tissue)                      | -                                  | 0.37 (0.33-0.46)                   |
| Brain concentration (nmol/g of tissue)                       | -                                  | 0 (0-0)                            |
| Kidney concentration (nmol/g of tissue)                      | -                                  | 0.81 (0.69-0.94)                   |
| Small intestine concentration (nmol/g of tissue)             | -                                  | 2.78 (1.58-4.83)                   |
| Large intestine concentration (nmol/g of tissue)             | -                                  | 1.17 (0.73-1.98)                   |
| Testicle concentration (nmol/g of tissue)                    | -                                  | 0.167 (0.06-0.60)                  |

Data are shown as median with lower and upper limits.

Abbreviations: CL – clearance;  $V_{ss}$  – steady state volume of distribution;  $T_{max}$  – time to reach maximum concentration;  $C_{max}$  – maximum concentration; AUC - area under the concentration–time curve; MM-129 - pyrazolo[4,3-e]tetrazolo[4,5-b][1,2,4]triazine sulfonamide

**Table S2.** Hematological analysis of whole blood samples from mice exposed to MM-129 concentrations or vehicle (VEH) after short-term and long-term administration.

| short-term administration             |                  |                      |                      |                      |
|---------------------------------------|------------------|----------------------|----------------------|----------------------|
|                                       | VEH              | MM-129<br>10 µmol/kg | MM-129<br>20 µmol/kg | MM-129<br>40 µmol/kg |
| WBC, 10 <sup>3</sup> /mm <sup>3</sup> | 4.38±1.91        | 5.10±2.87            | 4.33±3.10            | 7.30±2.43            |
| RBC, 10 <sup>6</sup> /mm <sup>3</sup> | 8.82±0.21        | 8.65±0.43            | 9.38±1.24            | 9.11±0.61            |
| HGB, g/dL                             | 14.4±0.38        | 13.7±0.70            | 15.0±2.07            | 714.5±0.99           |
| HCT, %                                | 49.5±1.10        | 48.3±2.24            | 53.7±7.63            | 51.5±3.59            |
| MCV, µm <sup>3</sup>                  | 56 (56-57)       | 55.5 (55-57)         | 57 (56-58)           | 56.5 (56-57)         |
| MCH, pg                               | 16.3±0.26        | 16.0±0.47            | 16.1±0.24            | 15.9±0.17            |
| MCHC, g/dl                            | 29 (28.5-29.8)   | 28.4 (27.8-28.8)     | 28 (27.8-29.3)       | 28 (27.8-28.2)*      |
| PLT, 10 <sup>3</sup> /mm <sup>3</sup> | 423 (350-496)    | 435 (312-502)        | 412.0 (351-627)      | 433 (360.0-628.0)    |
| long-term administration              |                  |                      |                      |                      |
|                                       | VEH              | MM-129<br>10 µmol/kg | MM-129<br>20 µmol/kg | MM-129<br>40 µmol/kg |
| WBC, 10 <sup>3</sup> /mm <sup>3</sup> | 4.99±2.68        | 7.07±3.36            | 8.00±1.46            | 9.33±0.97            |
| RBC, 10 <sup>6</sup> /mm <sup>3</sup> | 8.98 (6.16-9.98) | 8.71 (8.07-9.35)     | 8.77 (8.14-8.91)     | 8.23 (7.33-8.72)     |
| HGB, g/dL                             | 14.1±0.30        | 14.1±0.54            | 14.3±0.63            | 13.3±0.95            |
| HCT, %                                | 51.3 (35.5-56.9) | 51 (46.3-53.5)       | 49.8 (46.5-52)       | 48.15 (41.9-49.9)    |
| MCV, µm <sup>3</sup>                  | 57 (55-59)       | 57 (56-59)           | 57 (57-60)           | 57.5 (57-60)         |
| MCH, pg                               | 15.6±0.48        | 16.0±0.28            | 16.6±0.32***         | 16.4±0.21**          |
| MCHC, g/dl                            | 27.4±0.50        | 28.0±0.65            | 28.7±0.55**          | 28.3±0.33            |
| PLT, 10 <sup>3</sup> /mm <sup>3</sup> | 466 (156-428)    | 421 (217-507)        | 426 (265-589)        | 481 (396-599)        |

Data are shown as medians with ranges or mean±SD; \*\* $p<0.01$ ; \*\*\* $p<0.001$  vs. VEH within the group,  $n=3-10$ .

Abbreviations: VEH – vehicle; WBC – white blood cells; RBC – red blood cells; PLT – platelets; HGB – hemoglobin; HCT – hematocrit; MCV – mean corpuscular volume; MCH – mean corpuscular hemoglobin; MCHC – mean corpuscular hemoglobin concentration; MM-129 – pyrazolo[4,3-*e*]tetrazolo[4,5-*b*][1,2,4]triazine sulfonamide.

**Table S3.** Biochemical parameters in mice exposed to MM-129 concentrations or vehicle (VEH) after short-term and long-term administration.

| short-term administration |               |                      |                      |                      |
|---------------------------|---------------|----------------------|----------------------|----------------------|
|                           | VEH           | MM-129<br>10 µmol/kg | MM-129<br>20 µmol/kg | MM-129<br>40 µmol/kg |
| ALT, U/I                  | 14.40±2.97    | 38.40±21.3*          | 41.80±33.83          | 68.7±46.6*           |
| AspAT, U/I                | 79.00 (62-82) | 77 (72-90)           | 92 (70-137)          | 160.0* (105-301)     |
| BUN, mg/dl                | 52.0±9.67     | 43.60±7.64           | 44.40±20.30          | 53.0±10.90           |
| CREA, mg/dl               | <0.46         | <0.46                | <0.46                | <0.46                |
| Total bilirubin, mg/dl    | <0.15         | <0.15                | <0.15                | 1.93±1.18            |
| AMYL, U/I                 | 2141.0±132    | 1968.0±155           | 1615.0±36            | 1686.0±699           |
| LDH, U/I                  | 151.0±47.6    | 211.5±17.6           | 212.8±75.5           | 396.0±309            |
| CK, U/I                   | 92.60±7.57    | 109.0±27.7           | 120.0±31.1           | 132.0±48.2           |
| Pi, mg/dl                 | 8.95±0.5      | 8.50±0.62            | 7.82±0.63            | 8.60±0.28            |
| long-term administration  |               |                      |                      |                      |
|                           | VEH           | MM-129<br>10 µmol/kg | MM-129<br>20 µmol/kg | MM-129<br>40 µmol/kg |
| ALT, U/I                  | 28.0±10.3     | 26.0±3.4             | 25.4±5.1             | 26.4±11.1            |
| AspAT, U/I                | 134.0±18.4    | 118.0±40.5           | 101.0±21.3           | 212.0±105*           |
| BUN, mg/dl                | 36.8±5.7      | 37.2±2.5             | 35.8±6.3             | 34.6±4.6             |
| CREA, mg/dl               | <0.46         | <0.46                | <0.46                | <0.46                |
| Total bilirubin, mg/dl    | <0.15         | <0.15                | <0.15                | <0.15                |
| AMYL, U/I                 | 1364.0±69.7   | 1429.0±231.0         | 1320.0±125.0         | 1325.0±232.0         |
| LDH, U/I                  | 312.0±115.0   | 249.0±63.1           | 290.1±38.5           | 522.0±179.0          |
| CK, U/I                   | 221.0±119.0   | 250.0±174.0          | 153.0±54.5           | 1082.0±1126          |
| Pi, mg/dl                 | 6.94±0.92     | 7.38±0.8             | 7.75±1.2             | 8.36±0.4             |

Data are shown as medians with ranges or mean±SD; \*  $p<0.05$  vs. VEH within the group,  $n=3-10$ . Abbreviations: ALT – alanine transaminase; AMYL – amylase; AspAT – aspartate aminotransferase; BUN – blood urea nitrogen; CREA – creatinine; AMYL – amylase; LDH – lactate

dehydrogenase; CK – creatine kinase; Pi – phosphorus; MM-129 - pyrazolo[4,3-e]tetrazolo[4,5-b][1,2,4]triazine sulfonamide.

**Table S4.** Selected parameters of bone marrow examination of mice exposed to MM-129 concentrations or vehicle (VEH) after long-term administration.

| parameters (percentage)         | VEH             | MM-129<br>10 $\mu\text{mol/kg}$ | MM-129<br>20 $\mu\text{mol/kg}$ | MM-129<br>40 $\mu\text{mol/kg}$ |
|---------------------------------|-----------------|---------------------------------|---------------------------------|---------------------------------|
| myeloblasts                     | 0,552 $\pm$ 0.5 | 0,47 $\pm$ 0,16                 | 1,06 $\pm$ 0,515                | 0,742 $\pm$ 0,517               |
| promyelocytes                   | 2,96 $\pm$ 1.5  | 3,71 $\pm$ 0.82                 | 4,88 $\pm$ 2.11                 | 5,91 $\pm$ 1.23*                |
| myelocytes                      | 10,7 $\pm$ 1.33 | 10,9 $\pm$ 2.2                  | 13,8 $\pm$ 2                    | 13,3 $\pm$ 5.13                 |
| metamyelocytes                  | 14,1 $\pm$ 1,94 | 14,3 $\pm$ 1.7                  | 13,6 $\pm$ 1.09                 | 13,1 $\pm$ 1.34                 |
| neutrophils (bands)             | 13.8 $\pm$ 3.1  | 15 $\pm$ 2.64                   | 13.8 $\pm$ 1.65                 | 13.9 $\pm$ 3.47                 |
| neutrophils (segs)              | 12,9 $\pm$ 3.8  | 12,2 $\pm$ 1.93                 | 13,1 $\pm$ 2.49                 | 11,6 $\pm$ 3.63                 |
| proerythroblast                 | 0,78 $\pm$ 0.59 | 0,4 $\pm$ 0.3                   | 0,72 $\pm$ 0.5                  | 0,77 $\pm$ 0.69                 |
| basophilic erythroblast         | 8,73 $\pm$ 2.75 | 6,97 $\pm$ 1.34                 | 7,48 $\pm$ 2.97                 | 9,13 $\pm$ 0.73                 |
| polychromatophilic erythroblast | 10,3 $\pm$ 1.47 | 9,97 $\pm$ 1.02                 | 8,54 $\pm$ 2.7                  | 9,86 $\pm$ 2.88                 |
| acidophilic erythroblasts       | 12,1 $\pm$ 2.26 | 12,5 $\pm$ 1.48                 | 11 $\pm$ 1.53                   | 9,19 $\pm$ 1.74                 |

Data are shown as mean  $\pm$  SD; \*  $p < 0.05$  vs. VEH within the group,  $n = 5$ .

Abbreviations: MM-129 - pyrazolo[4,3-e]tetrazolo[4,5-b][1,2,4]triazine sulfonamide; VEH – vehicle.

**Table S5.** The effect of MM-129 on platelet function and coagulation parameters *in vitro* and *in vivo* in rats.

| <i>in vitro</i> study                 |                     |                              |
|---------------------------------------|---------------------|------------------------------|
|                                       | VEH                 | MM-129 10 $\mu\text{M}$      |
| Platelet aggregation                  |                     |                              |
| MaxA ( $\Omega$ )                     | 8.5 $\pm$ 1.3       | 8.3 $\pm$ 1.0                |
| Slp ( $\Omega/\text{min}$ )           | 2.9 $\pm$ 0.6       | 2.9 $\pm$ 0.6                |
| Lag time (s)                          | 90.9 $\pm$ 10.4     | 91.1 $\pm$ 7.4               |
| AUC                                   | 24.9 $\pm$ 5.1      | 23.9 $\pm$ 3.5               |
| <i>in vivo</i> study                  |                     |                              |
|                                       | VEH                 | MM-129 40 $\mu\text{mol/kg}$ |
| Platelet count ( $10^3/\text{mm}^3$ ) | 511.0 (497.0-644.0) | 573.0 (452.0-620.0)          |
| Platelet aggregation                  |                     |                              |
| MaxA ( $\Omega$ )                     | 9.1 $\pm$ 1.5       | 8.7 $\pm$ 1.6                |
| Slp ( $\Omega/\text{min}$ )           | 3.3 $\pm$ 0.6       | 2.9 $\pm$ 0.6                |
| Lag time (s)                          | 103.2 $\pm$ 19.4    | 120.1 $\pm$ 30.0             |
| AUC                                   | 25.1 $\pm$ 5.7      | 21.9 $\pm$ 6.4               |
| Coagulation parameter                 |                     |                              |
| aPTT (s)                              | 16.5 (14.0-20.9)    | 16.3 (13.8-24.0)             |
| PT(s)                                 | 12.3 $\pm$ 0.4      | 12.0 $\pm$ 1.0               |
| INR                                   | 1.4 $\pm$ 0.1       | 1.4 $\pm$ 0.1                |

The data were shown as median (full range) or mean  $\pm$  SD,  $n=7$ .

Abbreviations: MaxA - maximal extension; Slp - slope of platelet aggregation; AUC - area under the curve; aPTT - activated partial thromboplastin time; PT - prothrombin time; INR - international normalized ratio.
